# Supplementary material
Source: MDPI journal article supplement (https://www.mdpi.com/2079-6447/2/4/30)
Supplement: s1 [file s1]

# Gold Nanoparticles as Monoanion Sensors through Modified Electrophilicity

Almudena Martí <sup>1,\*</sup>, Pau Arroyo <sup>2,3</sup>, Pablo Gaviña <sup>2,3,4</sup>, Salvador Gil <sup>2,3,4</sup>, Margarita Parra <sup>1,2,3,4</sup>  
and José A. Sáez <sup>2,3,\*</sup>

<sup>1</sup> Faculté des Sciences et Technologies—Campus Aiguillettes, Université de Lorraine, CNRS, L2CM, UMR 7053, F-54506 Vandœuvre-lès-Nancy, France

<sup>2</sup> Instituto Interuniversitario de Investigación de Reconocimiento Molecular y Desarrollo Tecnológico (IDM), Universitat de València-Universitat Politècnica de València, Doctor Moliner 50, 46100 Burjassot, Spain; pau.arroyo@uv.es (P.A.); pablo.gavina@uv.es (P.G.); salvador.gil@uv.es (S.G.)

<sup>3</sup> Departamento de Química Orgánica, Universitat de València, Doctor Moliner 50, 46100 Burjassot, Spain

<sup>4</sup> CIBER de Bioingeniería, Biomateriales y Nanomedicina (CIBER-BBN), Av. Monforte de Lemos, 3-5, 28029 Madrid Spain

\* Correspondence: almudena.marti-morant@univ-lorraine.fr (A.M.); jose.a.saez@uv.es (J.A.S.)

## Contents:

|    |                                                      |    |
|----|------------------------------------------------------|----|
| 1. | TEM images of NP1 and NP1 after anions addition..... | S1 |
| 2. | UV-vis spectra of the GM titrations.....             | S2 |
| 3. | UV-vis spectra of the NP1 titrations.....            | S3 |
| 4. | Determination of the Limits of Detection (LODs)..... | S4 |

## S1 TEM images of NP1 and aggregated NP1 after some anions addition

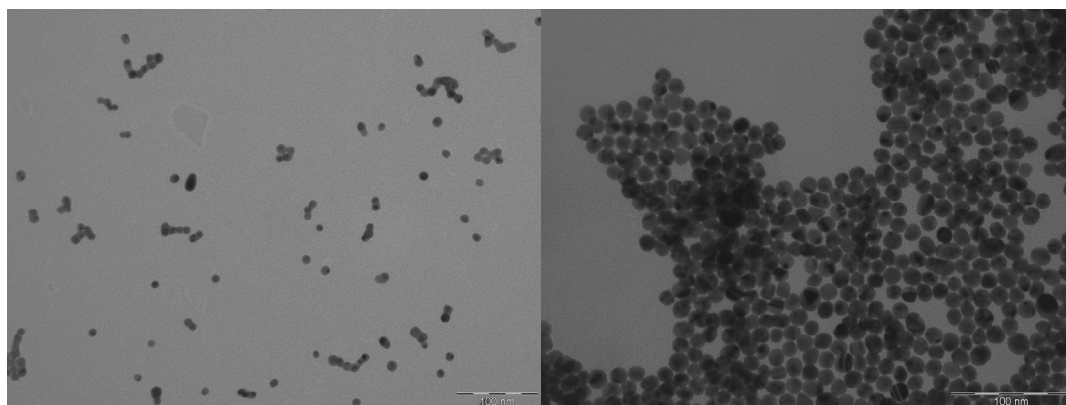

## S2 UV-vis spectra of the $\text{MG}^+$ on addition of increasing amounts of KCN and NaSH expressed $\text{mg}/\text{m}^3$ . Plot at 619 nm vs. KCN and NaSH concentration respectively.

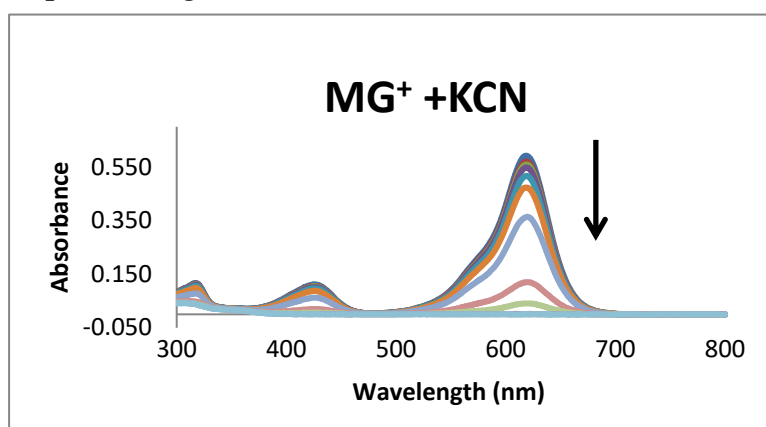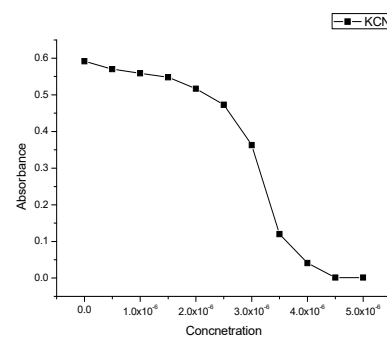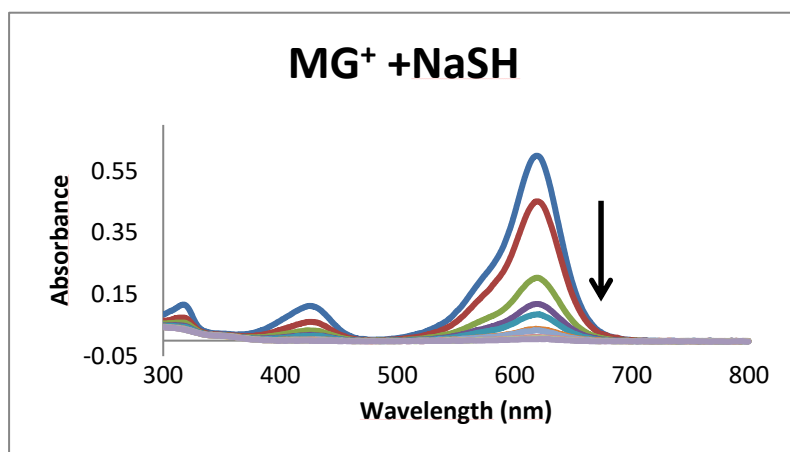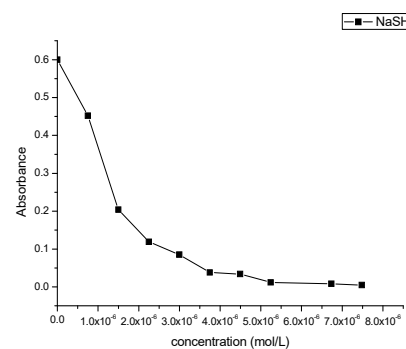

S3 UV-vis spectra of the NP1 on addition of increasing amounts of anions expressed mg/m<sup>3</sup>. Plots A<sub>620</sub>/A<sub>530</sub> vs. anion concentration, respectively.

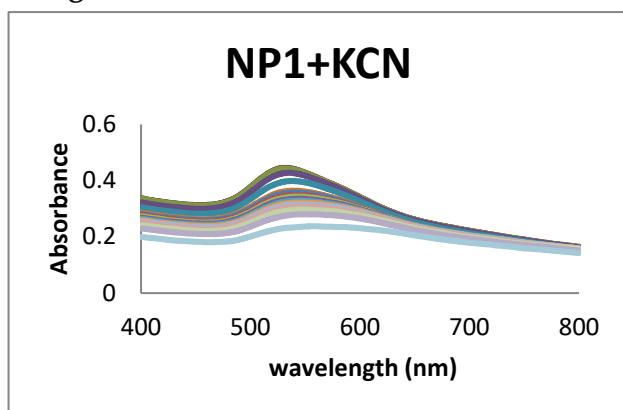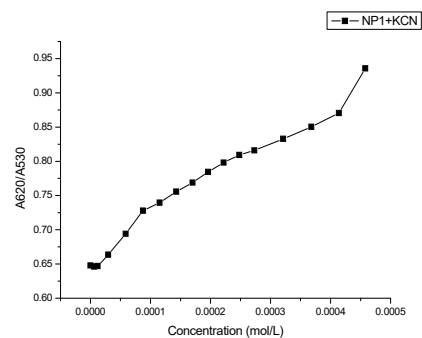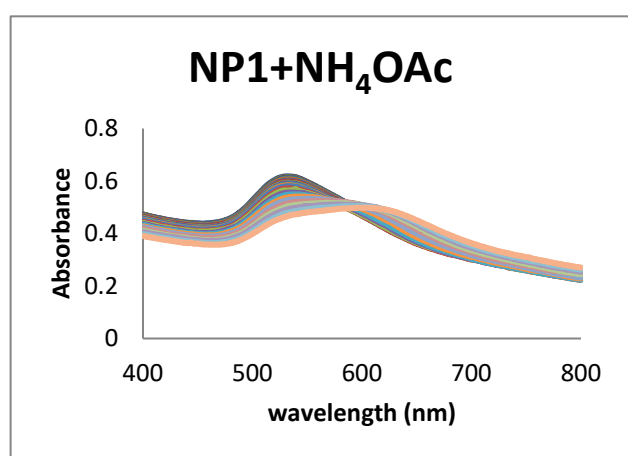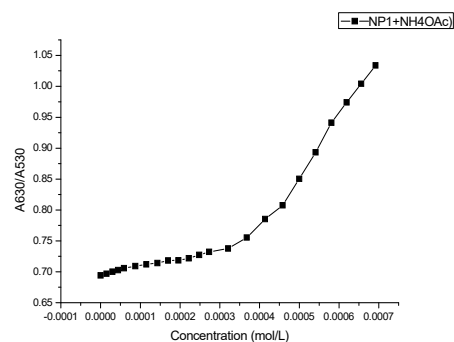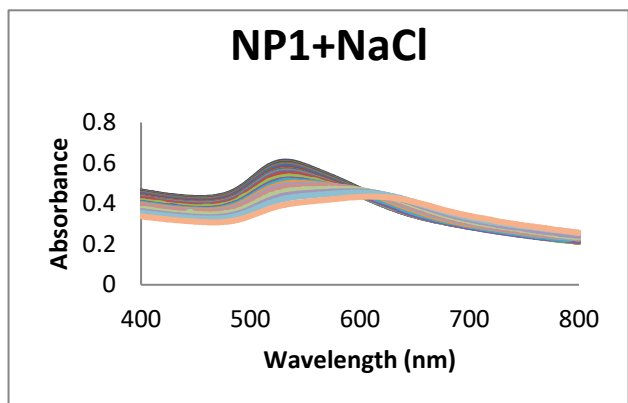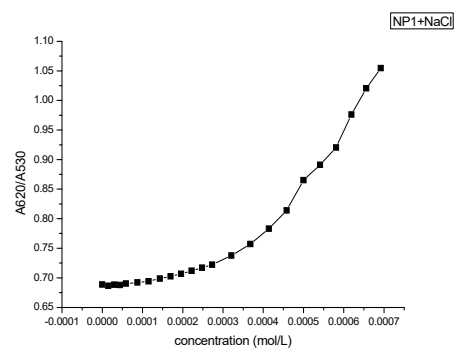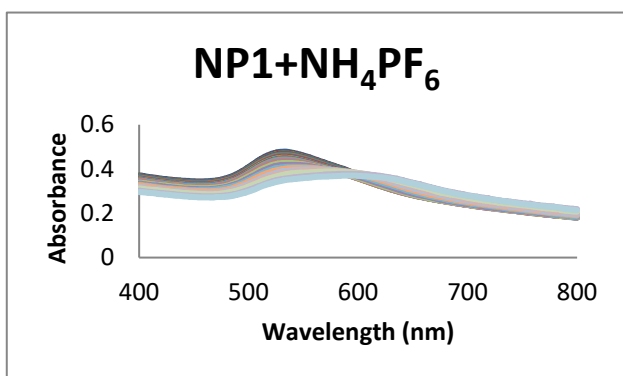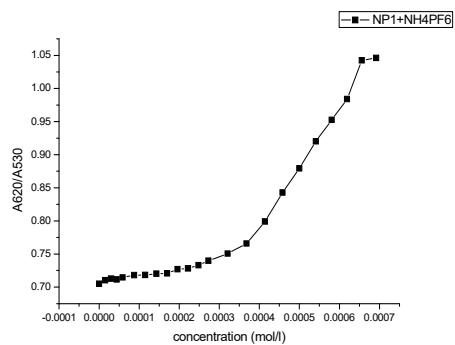

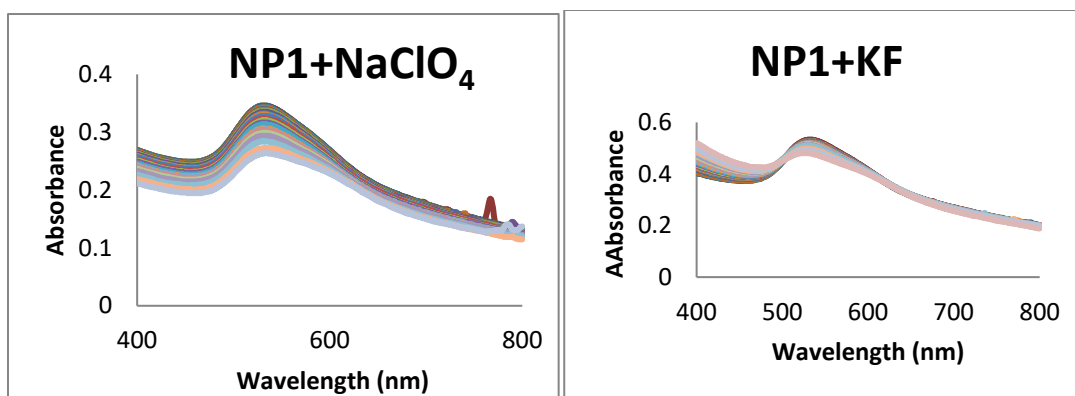

#### S4 Determination of the Limits of Detection (LODs)

The limits of detection (LODs) were calculated from the plots of the ratio of the intensity of the absorbance at ca. 620 nm and ca. 530 ( $A_{620}/A_{530}$ ) versus anion concentration expressed in ppm (mg/L). We arbitrarily define the LOD as the anion concentration at which a 10 % increase in the absorbance intensity ratio ( $A_{620}/A_{530}$ ), can be measured [1].

LOD was calculated by using the equation (1), where  $K=3$ ;  $S_b$  is the standard deviation of the blank and  $m$  is the slope of the calibration curve.

$$\text{LOD} = K \cdot \frac{S_b}{m} \quad (1)$$

The  $A_{620}/A_{530}$  value of the blank solution ( $y_b$ ), the LOD and the standard deviations were obtained from the slope of the calibration curves in the linear range.

|                | CN <sup>-</sup>              | AcO <sup>-</sup>            | F <sup>-</sup> | Cl <sup>-</sup>              | ClO <sub>4</sub> <sup>-</sup> | PF <sub>6</sub> <sup>-</sup> |
|----------------|------------------------------|-----------------------------|----------------|------------------------------|-------------------------------|------------------------------|
| Y              | 0.764                        | 0.71647                     |                | 0.70284                      |                               | 0.725                        |
| Sd             | 0.0856                       | 0.01665                     |                | 0.01568                      |                               | 0.1648                       |
| Y+3·Sd         | 1.0208                       | 0.76642                     |                | 0.74989                      |                               | 0.7745                       |
| LOD<br>(mol/L) | <b>3.099·10<sup>-3</sup></b> | <b>5.08·10<sup>-4</sup></b> | ---            | <b>4.547·10<sup>-4</sup></b> | ---                           | <b>5.22·10<sup>-4</sup></b>  |

#### REFERENCES

1. Liu, B.; Wang, H.; Wang, T.; Bao, Y.; Du, F.; Tian, J.; Li, Q.; Bai, R. A new ratiometric ESIPT sensor for detection of palladium species in aqueous solution Chem. Commun. 2012, 48, 2867-2869. <https://doi.org/10.1039/C2CC17677G>. B
